# Supplementary material for: Encapsulated mitochondria to reprogram the metabolism of M2-type macrophages for anti-tumor therapy
Source: Royal Society of Chemistry journal article supplement (doi:10.1039/d4nr02471k), 2024-01-01
Supplement: d4nr02471k1.pdf [file d4nr02471k1.pdf]

**Encapsulated mitochondria to reprogram the metabolism of M2-type  
macrophages for anti-tumor therapy**

Yonghui Wang<sup>1,2</sup>; Chang Liu<sup>2</sup>; Xiaodong Ma<sup>2</sup>; Anne Filppula<sup>2</sup>, Youbin Cui<sup>1</sup>; Jiangbin Ye<sup>3\*</sup>; Hongbo Zhang<sup>1,2,4\*</sup>

<sup>1</sup>Department of Thoracic Surgery, Organ Transplantation Center, The First Hospital of Jilin University, Changchun, China

<sup>2</sup>Pharmaceutical Sciences Laboratory, Åbo Akademi University, Turku 20520, Finland

<sup>3</sup>Department of Radiation Oncology, Stanford University School of Medicine, Stanford, CA 94305, USA.

<sup>4</sup>Turku Bioscience Centre, University of Turku and Åbo Akademi University, Turku 20520, Finland

\*Corresponding Author

E-mail: [hongbo.zhang@abo.fi](mailto:hongbo.zhang@abo.fi); [yejl@stanford.edu](mailto:yejl@stanford.edu)

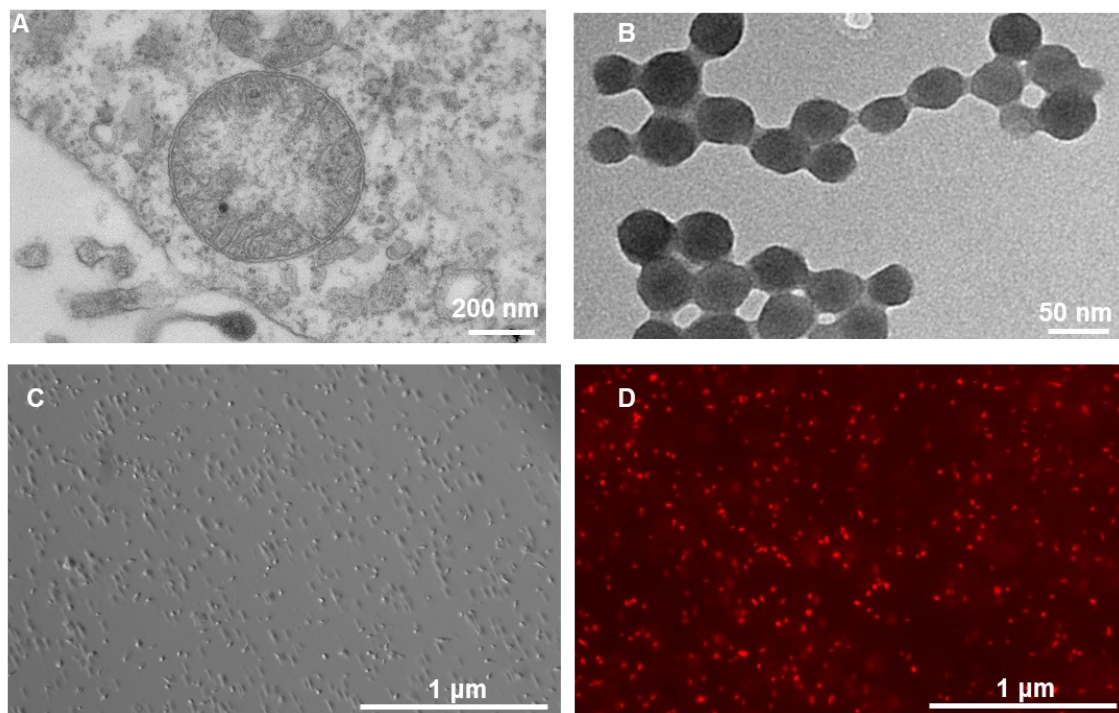

**Figure S1: TEM images of individual free mitochondria and ZIF-8 nanoparticles, and the morphology of free Mito under fluorescence microscope. (A): TEM image of isolated mitochondria; (B) TEM image of blank ZIF-8; (C): Brightfield image of free mitochondria; (D) Fluorescence image of free mitochondria.**

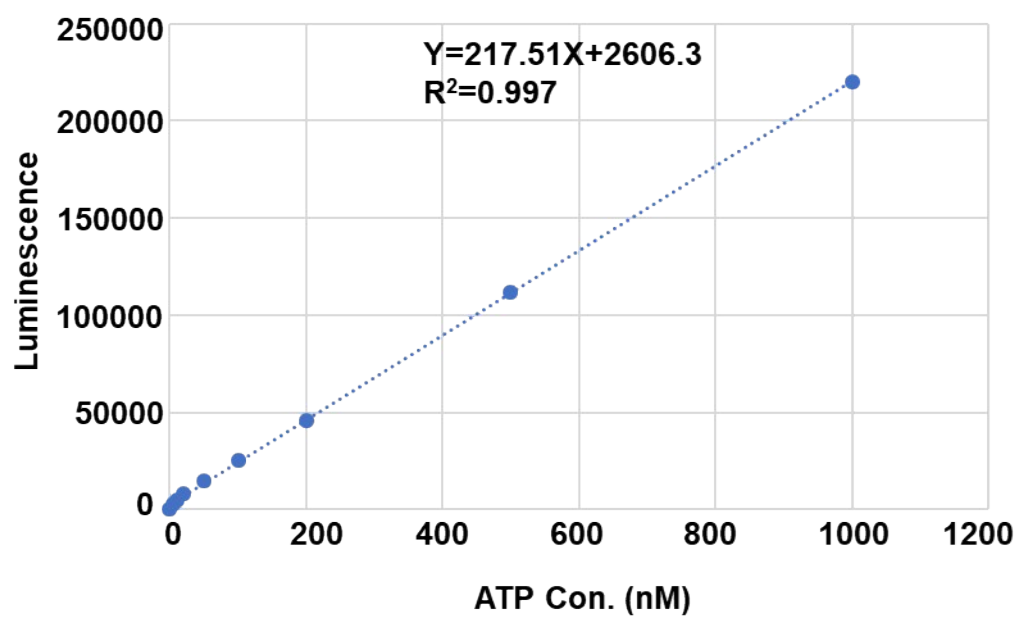

**Figure S2: Standard curve of ATP productive**

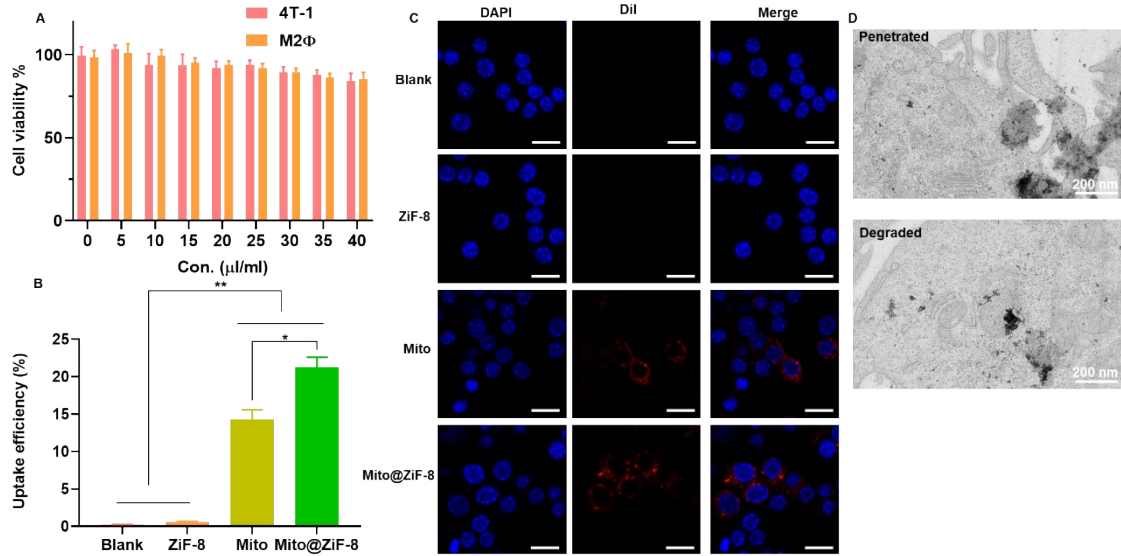

**Figure S3: Toxicity of pure ZiF-8 nanoparticles and results of M2Φ uptake with four groups.** (A): Toxicity of blank ZiF-8 to 4T-1 cells and M2Φ; (B) Flow cytometric analysis of M2Φ uptake; (C) Uptake results of M2Φ after CellTracker™ CM-DiI membrane dye labeling (scale bar: 1 μm); (D) M2Φ uptake process of Mito@ZiF-8 under TEM.

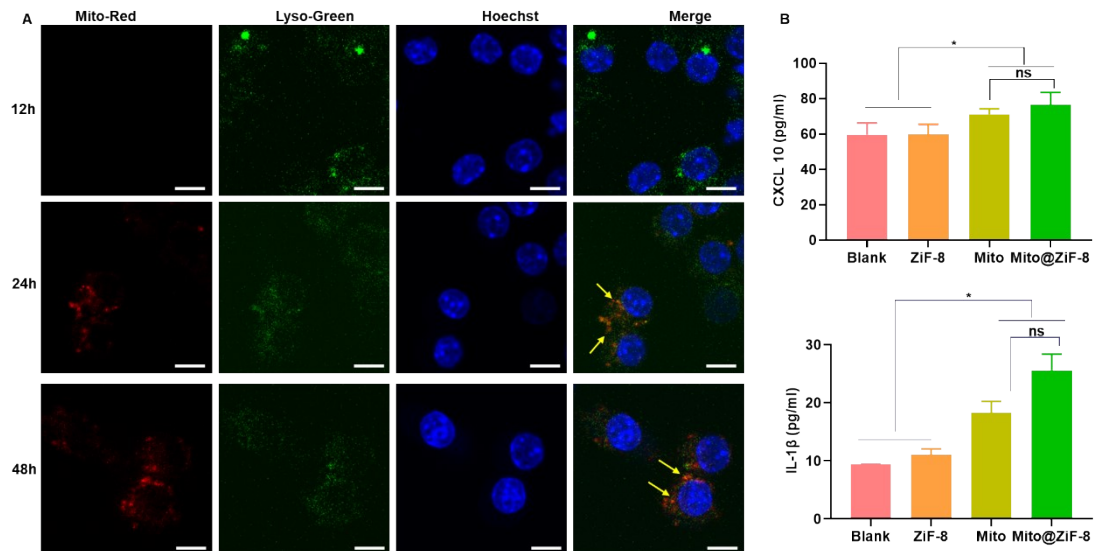

**Figure S4: Regulation of M2Φ Secretory Functions by Mito@ZiF-8.** (A): Lysosome escapes of Mito@ZiF-8 at different time points (scale bar: 1 μm); (B): Mito@ZiF-8

regulated M2Φ secretion of CXCL 10 and IL-1β after 5 days incubation.

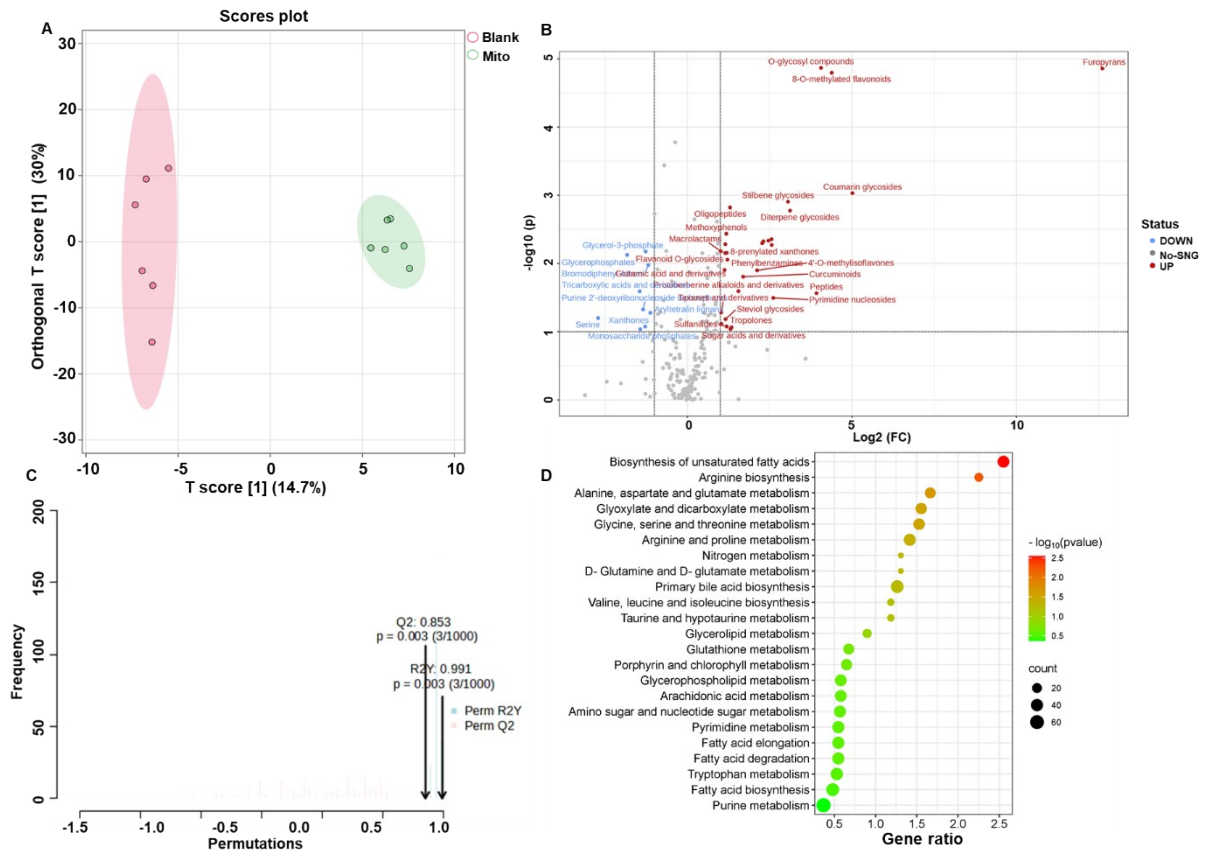

**Figure S5: Differences in metabolic intermediates between Blank group and Mito group.** (A) OPLS-DA analysis between Blank and Mito; (B) Volcano results between Blank and Mito; (C) Predictive analysis of metabolic models for Mito group; (D) The regulation of metabolic pathways in M2Φ after delivery to Mito was analyzed by bubble chart.

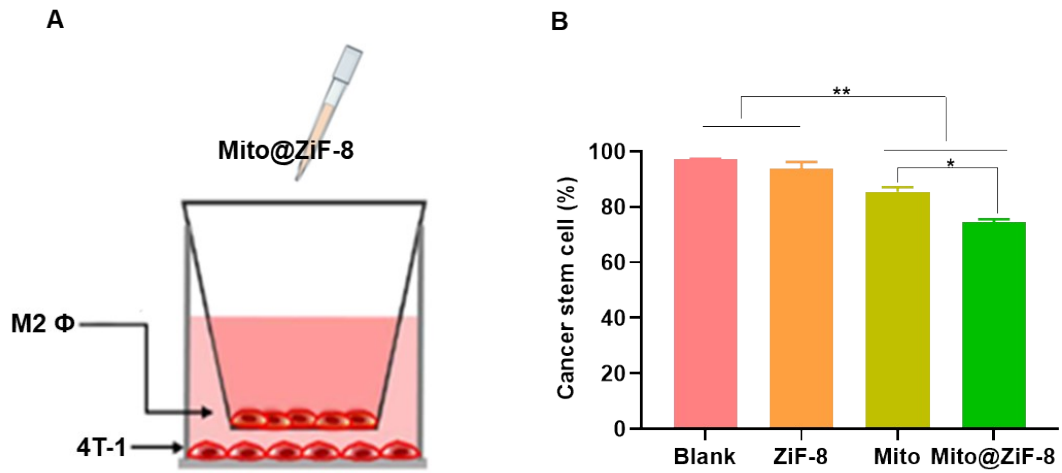

**Figure S6: The structure of the Transwells model and the statistical results of cancer cell stemness. (A) Transwell model; (B) Statistics analysis of cancer stem cell population.**
